# Supplementary material for: Influence of Sulfur-Curing Conditions on the Dynamics and Crosslinking of Rubber Networks: A Time-Domain NMR Study
Source: MDPI journal article supplement (doi:10.3390/polym14040767), 2022-02-16
Supplement: s1 [file s1]

# Influence of Sulfur-Curing Conditions on the Dynamics and Crosslinking of Rubber Networks: A Time-Domain NMR Study

Francesca Nardelli <sup>1</sup>, Lucia Calucci <sup>2,3,\*</sup>, Elisa Carignani <sup>2,3</sup>, Silvia Borsacchi <sup>2,3</sup>, Mattia Cettolin <sup>4</sup>, Marco Arimondi <sup>4</sup>, Luca Giannini <sup>4</sup>, Marco Geppi <sup>1,3,\*</sup>, and Francesca Martini <sup>1,3,\*</sup>

<sup>1</sup> Dipartimento di Chimica e Chimica Industriale, Università di Pisa, 56124 Pisa, Italy; francesca.nardelli@dpi.unipi.it (F.N.);

<sup>2</sup> Istituto di Chimica dei Composti OrganoMetallici, Consiglio Nazionale delle Ricerche, 56124 Pisa, Italy; elisa.carignani@pi.iccom.cnr.it (E.C.); silvia.borsacchi@pi.iccom.cnr.it (S.B.);

<sup>3</sup> Centro per l'Integrazione della Strumentazione Scientifica dell'Università di Pisa (CISUP), 56126 Pisa, Italy;

<sup>4</sup> Pirelli Tyre SpA, 20126 Milano, Italy; mattia.cettolin@pirelli.com (M.C.); Marco.Arimondi@pirelli.com (M.A.); Luca.Giannini@pirelli.com (L.G.)

\* Correspondence: lucia.calucci@pi.iccom.cnr.it (L.C.); francesca.martini@unipi.it (F.M.); marco.geppi@unipi.it (M.G.); tel: +39-0503152517 (L.C.); +39-0502219289 (M.G.); +39-0502219353 (F.M.)

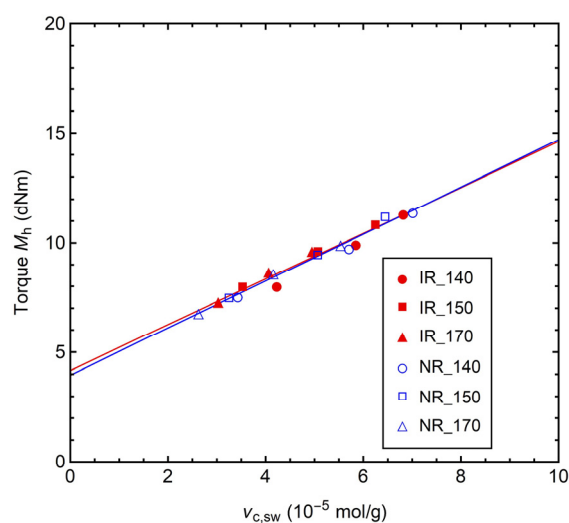

**Figure S1.** Maximum torque ( $M_h$ ) determined by MDR measurements *vs*  $v_{c,sw}$ .

**Table S1.** Best fit parameters obtained from the analysis of the CPMG relaxation curves of the sulfur cured IR samples, performed as described in paragraph 2.5 of the main text.

| Sample    | $T_{2,\text{weib}}$ (ms) | $C_{\text{weib}}$ (%) | $\beta$ | $T_{2,\text{exp}}$ (ms) | $C_{\text{exp}}$ (%) |
|-----------|--------------------------|-----------------------|---------|-------------------------|----------------------|
| IR_140_S1 | 1.15                     | 81                    | 1.5     | 2.95                    | 19                   |
| IR_140_S2 | 0.98                     | 84                    | 1.5     | 3.34                    | 16                   |
| IR_140_S3 | 0.89                     | 82                    | 1.5     | 2.76                    | 18                   |
| IR_150_S1 | 1.20                     | 84                    | 1.5     | 2.95                    | 16                   |
| IR_150_S2 | 1.03                     | 86                    | 1.4     | 2.77                    | 14                   |
| IR_150_S3 | 0.92                     | 81                    | 1.5     | 2.64                    | 19                   |
| IR_170_S1 | 1.26                     | 84                    | 1.5     | 2.92                    | 16                   |
| IR_170_S2 | 1.11                     | 84                    | 1.4     | 2.76                    | 16                   |
| IR_170_S3 | 0.98                     | 83                    | 1.4     | 2.69                    | 17                   |

**Table S2.** Best fit parameters obtained from the analysis of the CPMG relaxation curves of the sulfur cured NR samples, performed as described in paragraph 2.5 of the main text.

| Sample    | $T_{2,\text{weib}}$ (ms) | $C_{\text{weib}}$ (%) | $\beta$ | $T_{2,\text{exp}}$ (ms) | $C_{\text{exp}}$ (%) |
|-----------|--------------------------|-----------------------|---------|-------------------------|----------------------|
| NR_140_S1 | 1.20                     | 81                    | 1.6     | 2.51                    | 19                   |
| NR_140_S2 | 0.95                     | 85                    | 1.5     | 2.49                    | 15                   |
| NR_140_S3 | 0.86                     | 84                    | 1.5     | 2.28                    | 16                   |
| NR_150_S1 | 1.24                     | 87                    | 1.6     | 3.54                    | 13                   |
| NR_150_S2 | 1.00                     | 84                    | 1.5     | 2.73                    | 16                   |
| NR_150_S3 | 0.89                     | 88                    | 1.5     | 2.92                    | 12                   |
| NR_170_S1 | 1.25                     | 88                    | 1.5     | 3.42                    | 12                   |
| NR_170_S2 | 1.09                     | 88                    | 1.5     | 3.43                    | 12                   |
| NR_170_S3 | 0.94                     | 86                    | 1.5     | 2.65                    | 14                   |

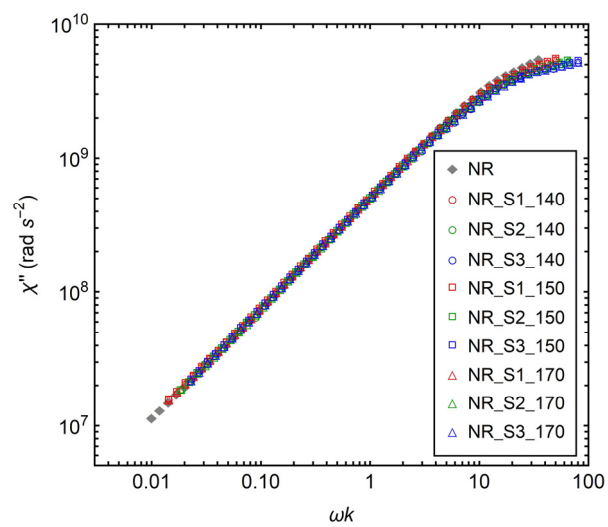

**Figure S2.** NMR susceptibility ( $\chi''$ ) master curves of the indicated NR samples obtained as described in paragraph 2.6 of the main text.
